1 **Ongoing rapid evolution of a post-Y region revealed by chromosome-scale genome assembly**  
2 **of a hexaploid monoecious persimmon (*Diospyros kaki*)**

3

4 Ayano Horiuchi<sup>1</sup>, Kanae Masuda<sup>1</sup>, Kenta Shirasawa<sup>2</sup>, Noriyuki Onoue<sup>3</sup>, Naoko Fujita<sup>1</sup>, Koichiro  
5 Ushijima<sup>1</sup>, Takashi Akagi<sup>1,4,\*</sup>

6

7 1. Graduate School of Environmental and Life Science, Okayama University, Okayama, Japan

8 2. Kazusa DNA Research Institute, Kazusa-Kamatari, Kisarazu, Chiba, 292-0818, Japan

9 3. Institute of Fruit Tree and Tea Science, NARO, 301-2 Mitsu, Akitsu, Higashihiroshima, Hiroshima  
10 739-2494, Japan

11 4. Japan Science and Technology Agency (JST), PRESTO, Kawaguchi-shi, Saitama 332-0012, Japan

12

13

14 \*Corresponding author

15 Email: [takashia@okayama-u.ac.jp](mailto:takashia@okayama-u.ac.jp), TEL: +81-86-251-8337

16

## 17 **Abstract**

18 Sex chromosomes have evolved independently in many plant lineages. They have often undergone  
19 rapid structural degeneration and extension of non-recombining regions, which is conventionally  
20 considered to be strongly associated with the expression of sexually dimorphic traits. In this study, we  
21 assembled a monoecious hexaploid persimmon (*Diospyros kaki*) in which the Y chromosome had lost  
22 its function in male determination. Comparative genomic analysis among *D. kaki* and its dioecious  
23 relatives revealed that the non-functional Y chromosome ( $Y^m$ ) via silencing of the sex-determining  
24 gene, *OGI*, arose approximately two million years ago. Comparative analyses of the whole X and  $Y^m$   
25 chromosomes suggested that the non-functional male-specific region of the Y-chromosome (MSY),  
26 or post-MSY, retained certain conserved characteristics of the original functional MSY. Specifically,  
27 comparison of the functional MSY in *D. lotus* and the non-functional post-MSY in *D. kaki* indicated  
28 that the post-MSY had been rapidly rearranged mainly via ongoing transposable element bursts, as  
29 well as in the functional MSY. These results suggest a novel interpretation that the rapid evolution of  
30 the post-MSY (and possibly also MSYs in dioecious *Diospyros* species) might reflect the ancestral  
31 genomic properties of these regions, rather than the evolution of male-determining functions and/or  
32 sexually dimorphic traits.

33

## 34 **Introduction**

35 In contrast to animals, many different plant lineages have independently evolved chromosomal  
36 sex determination (or dioecious) systems from functionally hermaphrodite ancestors (Westergaard  
37 1958, Charlesworth 1985, Ming et al. 2011, Henry et al. 2018). A comparative framework can therefore  
38 shed light on the diversity of routes by which sex determination and sex chromosomes may evolve.  
39 Recent advances in genomic technologies have revealed that the sex determining factors in different  
40 plant lineages differ in the molecular developmental functions involved, and also the evolutionary  
41 pathways that led to separate sexes (Akagi et al. 2014, 2018, 2019, Harkess et al. 2017, 2020, Muller  
42 et al. 2020, Kazama et al. 2022). Some species have single sex-determining genes or small sex-

43 linked regions, while other plants have sex chromosomes, distinguished by the presence of physically  
44 extensive non-recombining regions (sometimes resulting from recombination suppression), and  
45 sometimes cytologically detectable heteromorphism. The loss of recombination may sometimes be  
46 associated with the evolution of sexual dimorphic phenotypic traits, which can lead to the  
47 establishment of sexually antagonistic polymorphisms (Charlesworth and Charlesworth 1978, Rice et  
48 al. 1992). Renner and Muller (2021) have questioned whether sex chromosome evolution in different  
49 plant lineages shares any common rules, and noted that the sizes of the male specific regions (Y-  
50 linked regions, or MSYs) are not related with the ages of different plant sex determining systems or  
51 the gene densities in the MSY, which might reflect the potential to be involved in the evolution of  
52 sexually dimorphic traits. In kiwifruit (the genus *Actinidia*), sexual dimorphisms being conserved  
53 across the genus. Nevertheless, transpositions of the two sex-determining factors have recurrently  
54 and independently formed new sex-linked regions with hemizygous MSYs (Akagi et al. unpublished).  
55 These MSYs contain only three conserved genes, including two sex-determining genes, one of which  
56 controls most of the sexual dimorphisms. This example suggests that MSYs might often evolve by a  
57 process different from the one involving the evolution of sexual dimorphism outlined above. One  
58 possibility proposes that a lack of recombination could be the ancestral state for some MSY regions,  
59 as plant (and animal) genomes often include extensive pericentromeric regions in which  
60 recombination is rare, and in some cases recombination is also rare in telomeric regions  
61 (Charlesworth 2019).

62 In persimmon (in the genus *Diospyros*), diploid species are dioecious, apart from hermaphroditic  
63 mutants/lines (Masuda and Akagi et al. 2022). The sexes are determined by a Y-linked gene, *OGI*,  
64 which formed by a duplication of an autosomal counterpart gene, *MeGI*, and expresses a small RNA  
65 that suppresses *MeGI* expression (Akagi et al. 2014). *MeGI* encodes a homeodomain ZIP1 (HD-ZIP1)  
66 which has neofunctionised via a lineage-specific duplication to gain roles in both suppressing  
67 androecium development and promoting gynoecium growth (Yang et al. 2019, Akagi et al. 2020). In  
68 contrast, individual trees of the hexaploid Oriental persimmon (*D. kaki*;  $2n=6x=90$ ) are mainly either

69 gynoecious or wholly monoecious, with occasional production of hermaphroditic flowers on  
70 monoecious trees (Masuda et al. 2022, Masuda and Akagi 2022). Genetically female individuals (with  
71 hexaplex X: 6A+6X) are gynoecious, whereas genetically male individuals (carrying at least one Y  
72 chromosome) can be monoecious (Akagi et al. 2016a, Masuda et al. 2020). In the *D. kaki* Y-linked  
73 region, *OGI* was largely silenced by insertion of a SINE-like sequence named *Kali* into the promoter  
74 region (Akagi et al. 2016a). *MeGI* in this species has a novel epigenetic *cis*-regulatory developmental  
75 switch that controls its expression pattern, and can produce either male or female flowers (Akagi et  
76 al. 2016a, 2022). Thus *D. kaki* has lost the male-determining function, and become monoecious. Its  
77 Y acts as a  $Y^m$  factor, employing a similar terminology as  $Y^h$ , which is used for the Y of hermaphrodite  
78 revertants of dioecious papaya (Wang et al. 2012).

79 Here, by chromosome-scale whole-genome assembly of monoecious *D. kaki* cv. Taishu (6A +  
80 XXXXY; Akagi et al. 2016b), we clarify the history of  $Y^m$  and the evolution of the former MSY, by  
81 comparing  $Y^m$  with a functioning Y-linked region in a close diploid relative, the Caucasian persimmon  
82 (*D. lotus*).

83

## 84 **Results and Discussion**

### 85 **Evolutionary paths of hexaploid persimmon and the silenced Y-determinant, $OGI^m$**

86 We assembled *Diospyros kaki* cv. Taishu ( $2n=6x=90$ , 6A + XXXXY) whole genome  
87 sequences with PacBio HiFi reads, initially resulting in total 2.39Gbp scaffolds with N50 = 21.2Mbp  
88 ( $N = 37$ ) (Supplementary Table S1-S2 for the basic genome characterization, Supplementary Fig. S1).  
89 Further scaffolding using RaGOO/RagTag (Alonge et al. 2019, 2022) with a reference genome of a  
90 close relative, *D. lotus* cv. Kunsenshi-male (2A + XY), and integration of allelic sequences resulted in  
91 generation of 14 chromosome scale autosomal scaffolds plus the XY pair (“pseudomolecule  
92 sequences”), consistent with the basic chromosome number of *Diospyros* species ( $N = 15$ ). These  
93 scaffolds include 36,866 predicted genes covering 94.5% of the eudicot complete core gene set  
94 (complete BUSCOs (C)) (Figure 1B, Supplementary Table S1). All the genome sequences and the

95 annotated data were deposited to the Persimmon Genome Database  
96 (<http://persimmon.kazusa.or.jp/index.html>) and Plant GARDEN (<https://plantgarden.jp/en/index>).  
97 Synteny analysis of the pseudomolecule sequences and analysis of the distribution of silent  
98 divergence ( $dS$ ) values in putatively homologous gene pairs (see Materials and Methods), suggest  
99 that *D. kaki* underwent at least two paleo-genome duplication events, producing pairs with  $dS = 0.62$ -  
100 0.80 and 1.24-1.50, which would, respectively, be consistent with a *Diospyros*-specific genome  
101 duplication,  $Dd$ - $\alpha$  (Akagi et al. 2020) and the hexaploidization- $\gamma$  that occurred in the common ancestor  
102 of eudicotyledonous plants (Jaillon et al. 2009) (Figure 1). Distributions of the  $dS$  values in *D. kaki*  
103 allelic sequences, and between orthologous gene pairs in *D. kaki* and its close diploid relatives, *D.*  
104 *lotus* (Akagi et al. 2020) or *D. oleifera* (Suo et al. 2020), (Figure 2A), suggest that the current diversity  
105 of hexasomic alleles in *D. kaki* ( $dS = 0.0141$  for the peak) was established immediately after the  
106 divergence of *D. kaki* and *D. oleifera* ( $dS = 0.0225$ ). The divergence of *D. lotus* may slightly predate  
107 these events, as  $dS$  is slightly larger (0.0301,  $p = 0.0013$  for the  $dS$  distribution). Importantly, the  
108 pairwise  $dS$  values between the sequences of the SINE transposable element, *Kali*, within the *OGI*  
109 sequence (see above) in 12 cultivars from various East Asian area (Supplementary Table S3, Akagi  
110 et al. 2016b), range up to  $>0.02$  (Figure 2A). These results suggest that this insertion coincided with  
111 the divergence of *D. kaki* and *D. oleifera*, and may predate the hexaploidization events, as  
112 summarized in Figure 2B. The *OGI* gene would then be estimated to have been established (creating  
113 a proto-Y) approximately 25 million years ago (mya), using an estimated rate of  $4 \times 10^{-9}$  substitutions  
114 per synonymous site per year in *Arabidopsis* (Beilstein et al. 2010, Wang et al. 2012), while the silence  
115 of *OGI* ( $OGI^m$ ) to become a  $Y^m$  factor in the *D. kaki* lineage occurred approximately 2 mya. Genome-  
116 wide synteny analysis with MCScanX supported the species divergence order estimated from the  $dS$   
117 values, as *D. oleifera* exhibited more similar gene order to that in the *D. kaki* genome than to the *D.*  
118 *lotus* order (Figure 2C). Note, however, that this might be due to the incomplete pseudomolecules in  
119 the published *D. lotus* genome database (<http://persimmon.kazusa.or.jp/>). Genome-wide  $dS$  values  
120 between *D. kaki* and *D. oleifera* or *D. lotus* in 200-kb sliding windows were mostly consistent with the

121 phylogenetic relationships of these species (Figure 2D). However, up to 3-4% of the genomic regions  
122 exhibited significantly lower  $dS$  values ( $p < 0.01$  for each bin, Student's  $t$ -test) between *D. kaki* and *D.*  
123 *lotus* than between *D. kaki* and *D. oleifera* (Figure 2E), suggesting potential introgressed regions from  
124 the *D. lotus* lineage, after the divergence of *D. kaki/D. oleifera* and *D. lotus*.

125

## 126 **Conservation of MSY characteristics in $Y^m$**

127 Synteny analysis indicated highly conserved gene orders between the *D. kaki* X and  $Y^m$   
128 chromosomes, except in the putative MSY (or post-MSY) region that includes the silenced  $OGI^m$   
129 (Figure 3A). The post-MSY occupies approximately 1.5Mbp in the pericentromeric region of  
130 chromosome 15 (Figure 3A, B, Supplementary Figure S2), with fragmented syntenic blocks compared  
131 with its X counterpart (Figure 3B). The  $dS$  values between X and  $Y^m$  alleles in monoecious *D. kaki*  
132 (Figure 3C) reached 0.212 in the central region flanking the *OGI* gene (Figure 3D), which is  
133 comparable to the  $dS$  values in the functional MSY of dioecious *D. lotus* ( $dS = 0.196$  for the locus  
134 closest to *OGI*; Akagi et al. 2020), and the  $dS$  value between *OGI* and *MeGI* ( $dS = 0.205$ )  
135 corresponding to the initial establishment of the functional MSY (Akagi et al. 2014). We did not detect  
136 clear evidence for the formation of evolutionary strata, mainly due to the few X-Y allelic genes in the  
137 post-MSY, although the  $dS$  values between X- and Y-linked sequences decline with increased  
138 distance from  $OGI^m$  (Figure 3D). This situation was consistent with the functional MSY in dioecious *D.*  
139 *lotus* (Akagi et al. 2020). These results suggest that the post-MSY in  $Y^m$  chromosome has conserved  
140 some characteristics of the original functional MSY.

141 Under the two-factor model of the evolution of separate sexes and Y-linked regions  
142 (Charlesworth and Charlesworth 1978), hermaphrodite revertant individuals can arise, carrying so-  
143 called " $Y^h$ " chromosomes, and may have been favoured by artificial selection, as in the domestication  
144 of papaya (Wang et al. 2012, Van Buren et al. 2015, 2016) or in the grapevine (Zhou et al. 2017,  
145 2019). To test the possibility that the persimmon  $Y^m$  has also experienced such selection, we analysed  
146 nucleotide diversity ( $\pi$ ) and Tajima's  $D$  values in the  $Y^m$  chromosome, using the genome-wide SNPs

147 in resequencing data of 58 *D. kaki* cultivars (Supplementary Table S3, DRA015334 for the sequenced  
148 accessions in DDBJ). Recent selection for the  $Y^m$  allele should cause a “selective sweep”, with  
149 decreased diversity in the region. However, we did not detect this (Supplementary Fig. S3). This result  
150 would be consistent with the fact that all *D. kaki* Y chromosomes so far studied carry  $OGI^m$  (Akagi et  
151 al. 2016a), and suggested that the establishment of  $Y^m$  could have been favoured by a strong naturally  
152 occurring bottleneck in population size longer ago, rather than by artificial selection, perhaps when  
153 the species became hexaploid, with  $Y^m$  maintained neutrally in domesticated *D. kaki*.

154

### 155 **Ongoing rapid evolution of the post-MSY**

156         Despite only *ca.* 3.5 million years having elapsed since the divergence of *D. lotus* and *D. kaki*  
157 (see Figure 2B), their MSY regions differ by many rearrangements (Figure 4A, Supplementary Fig.  
158 S4A). Overall, only 5 of the 44 genes in the post-MSY are shared with the *D. lotus* MSY, and their  
159 physical orders were inverted (Supplementary Fig. S4B), in contrast to the flanking PAR, where most  
160 of the genes were shared between *D. lotus* and *D. kaki* (Supplementary Fig. S4C). The *D. kaki* post-  
161 MSY has also accumulated a high density of repetitive sequences, compared with the flanking PAR  
162 (Figure 4B). The *D. kaki* post-MSY, but not the corresponding region of the *D. kaki* X chromosome, is  
163 enriched with LTR-type transposable elements (TEs), especially the *Gypsy* class, unlike the *D. lotus*  
164 MSY (Figure 4C, Supplementary Fig. S5). The *D. lotus* MSY and the *D. kaki* post-MSY independently  
165 accumulated at least 31 mostly small ( $N \geq 3$ ) clusters of *Gypsy* class TEs (Supplementary Table  
166 S4). Approximately 2/3 of the *Gypsy* TEs in the post-MSY were not in clusters (using the criterion of  
167 >80% identity), suggesting that most are independently derived from sources elsewhere in the *D. kaki*  
168 genome. However, the largest *Gypsy* cluster (clst. 23) is a burst specific to the *D. kaki* post-MSY  
169 (Figure 4D). This cluster probably evolved very recently, after the establishment of the  $Y^m$ , as pairwise  
170 *dS* values never exceed 0.02. Similar recent duplications of specific *Gypsy* TEs are also detected in  
171 the *D. lotus* MSY, but on a smaller scale (Supplementary Fig. S6).

172         The highly rearranged structures in the *D. lotus* MSY and *D. kaki* post-MSY could reflect

173 canonical MSY evolution, as rearrangements and TE insertions in non-recombining regions are not  
174 selectively disadvantageous (because crossing over does not occur, which also prevents ectopic  
175 exchanges between different TE insertions). MSYs in other plant species indeed show such changes,  
176 compared with their X counterparts (Akagi et al. 2019 for kiwifruit, Harkess et al. 2020 for garden  
177 asparagus, Ma et al. 2022 for spinach, Akagi et al. unpublished for the genus *Actinidia*). In *D. lotus*,  
178 selection may prevent some of these changes, because the MSY contains a functional OGI gene,  
179 and possibly other factors controlling sexual dimorphisms, but the post-MSY in *D. kaki*, might be under  
180 weak, or no, purifying selection, allowing insertions of TEs and duplications to occur. In monoecious  
181 *D. kaki* trees, morphological differences between males and females, such as inflorescence structure  
182 or different flower numbers (Supplementary Fig. S7), are similar to the sexual dimorphisms in diploid  
183 species in the genus *Diospyros*, and must thus be independent of the Y-linked region, or might be  
184 pleiotropic effect(s) of the sex determining gene(s). This possibility was originally suggested by Darwin  
185 (1877), who used the term “compensation”, and it is supported in persimmon (in the genus *Diospyros*)  
186 and kiwifruit (in the genus *Actinidia*) (Akagi and Charlesworth 2019). An interesting observation is that,  
187 in both these genera, their extended MSYs are located within ancestrally repetitive (and therefore  
188 probably rarely recombining) pericentromeric or peritelomeric regions (Akagi et al. unpublished).  
189 Hence, the recent evolution of the post-MSY (and possibly also MSYs in dioecious species) might  
190 reflect these regions’ ancestral genomic properties, rather than having evolved male-determining  
191 functions and/or sexually dimorphic traits.

192

193

## 194 **Materials and Methods**

### 195 **Genome assembly**

196 For whole-genome assembly, *D. kaki* cv. Taishu young leaves were sampled at the Grape and  
197 Persimmon Research Station, Institute of Fruit Tree and Tea Science, National Agriculture and Food  
198 Research Organization (NARO), Higashihiroshima, Japan. Genomic DNA for sequencing was



199 extracted using the Genome-tip G100 (Qiagen, Venlo, Nederland). The genomic DNA was sheared  
200 into ~20 kb DNA fragments with a g-TUBE Prep Station (Covaris, Woburn, MA, USA) and a HiFi  
201 SMRTbell library was constructed with the SMRTbell Express Template Prep Kit 2.0 (PacBio, Menlo  
202 Park, CA, USA). The library DNA was fractionated using a BluePippin (Sage Science, Beverly, MA,  
203 USA) to eliminate fragments <20 kb and sequenced with a Four SMRT Cell 8M on the Sequel II  
204 system (PacBio). The sequence reads were converted into HiFi reads with the ccs pipeline (PacBio;  
205 <https://ccs.how>) and assembled with Hifiasm (Cheng et al. 2021). The obtained contigs were aligned  
206 to a reference genome sequence of the diploid male *D. lotus* 'Kunsenshi-male' (Akagi et al. 2020;  $2n$   
207 =  $2x = 30$ ,  $2A+XY$ ) for scaffolding using RaGOO/RagTag (Alonge et al. 2019, 2022) to build  
208 pseudomolecule sequences, with manual revisions as necessary.

209

## 210 **Repeat and gene annotations**

211 Repetitive sequences in the assemblies were identified with phRAIDER (Schaeffer et al. 2016) and  
212 RepeatMasker (Smit et al. 2015; <https://www.repeatmasker.org/>) using *de novo* repeat libraries built  
213 with RepeatModeler2 (Flynn et al. 2020). Repeat elements were classified into nine types with  
214 RepeatMasker: short interspersed nuclear elements (SINEs), long interspersed nuclear elements  
215 (LINEs), long terminal repeat (LTR) elements, DNA elements, small RNA, satellites, simple repeats,  
216 low-complexity repeats, and unclassified.

217 Protein-coding genes were predicted from the repeat-masked genome sequences. Gene  
218 prediction was conducted with the Braker2 pipeline, trained with 22 Illumina short-reads mRNA-seq  
219 data from a variety of organs (fruit flesh, Maeda et al. 2019; flower buds and flowers, Masuda et al.  
220 2022; and young leaf/flower primordia, Akagi et al. 2016a), at various developmental stages, in  
221 accordance with a previous pipeline (Shirasawa et al. 2022). The completeness of the assemblies  
222 was assessed using the BUSCO score (Simao et al. 2015).

223

## 224 **Synteny analyses**

225 Chromosome-scale sequence synteny was evaluated with D-GENIES (Cabanettes and Klopp 2018)  
226 for dot-plot visualization (<http://dgenies.toulouse.inra.fr/>). Two whole-genome sequence (fasta) files  
227 were aligned with Minimap2 using the D-GENIES default settings. Large-scale synteny based on the  
228 gene orders was examined with MCScanX (Wang et al. 2012), in which the detected collinearity was  
229 visualized using SynVisio (<https://synvisio.github.io/#/>). All-versus-all BLASTP analyses were  
230 performed among the protein sequences in the *D. lotus*, *D. oleifera*, and *D. kaki* genomes, with an e-  
231 value cut-off of  $<1e^{-40}$ . Syntenic blocks were constructed using MCScanX, with BLASTP and gff files,  
232 after preprocessing to be suitable for MCScanX. Intragenomic collinearity was evaluated by all-  
233 versus-all BLASTP analyses ( $<e^{-50}$  in BLASTP), for the whole genes, followed by selection with  
234 threshold values for silent-site divergence (*dS*; described later) and visualization with Circa software  
235 (<https://omgenomics.com/circa/>). Short-range syntenic blocks (or repetitive blocks within a  
236 chromosome) were identified with MUMmer4 (Marçais et al. 2018), using the nucmer program with  
237 the --maxmatch argument (with minimum length of the syntenic block = 25 bp).

238

### 239 **Detection of genetic diversity and age estimation**

240 For detection of genetic diversity within the paralogs in the interspecific comparisons, gene pairs  
241 between *D. kaki* and *D. lotus*, or *D. kaki* and *D. oleifera*, that exhibited significant sequence similarity  
242 ( $<e^{-50}$  in BLASTP) were subjected to in-codon frame alignment using their protein and nucleotide  
243 sequences with Pal2Nal and MAFFT ver. 7 under the L-INS-i model (Katoh and Standley 2013). The  
244 *dS* values (with Jukes–Cantor correction) for the alignments were estimated with MEGA X (Kumar et  
245 al. 2018). For genetic diversity within the genome-wide *D. kaki* alleles, the whole genes in the  
246 pseudomolecule sequences (14+XY chromosomes) were aligned to the predicted genes in the initial  
247 scaffolds excluding the components of the pseudomolecule sequences, followed by detection of *dS*  
248 values, as described. For detection of *dS* values surrounding the *Kali* SINE, we sequenced the  $<2$  kb  
249 PCR products flanking the *Kali* SINE (Akagi et al. 2016a, 2016b) and the mutated *OGL* in 12 cultivars  
250 (Supplementary Table S5). To estimate the divergence time between the gene pairs, we adopted an

251 estimated rate of  $4 \times 10^{-9}$  substitutions per synonymous site per year in accordance with previous  
252 reports (Beilstein et al. 2010, Wang et al. 2012).

253

### 254 **Characterization of the genomic context around the MSY**

255 For construction of Illumina genomic libraries, we used approximately 0.5  $\mu$ g genomic DNA of *D. kaki*  
256 cv. Taishu. The libraries were constructed using the KAPA HyperPlus Library Preparation Kit (KAPA  
257 Biosystems) and sequenced using the Illumina HiSeq 4000 platform (with 150 bp paired-end reads).  
258 All Illumina sequencing was conducted at the Vincent J. Coates Genomics Sequencing Laboratory at  
259 the University of California, Berkeley. The raw reads were processed using custom Python scripts  
260 developed in the Comai laboratory and available online  
261 (<http://comailab.genomecenter.ucdavis.edu/index.php/>), as previously described (Akagi et al. 2014).  
262 The preprocessed reads were aligned to the whole-genomic scaffolds of each species, with the  
263 Burrows–Wheeler Aligner Maximal Exact Match algorithm (Li and Durbin 2009), allowing up to 12%  
264 mismatches. The mapped reads were visualized with Integrative Genomics Viewer (Robinson et al.  
265 2011).

266

### 267 ***De novo* transposable element annotations and evolution**

268 Transposable elements in the genomes of *D. kaki* and *D. lotus* were detected with the Extensive *de-*  
269 *novo* TE Annotator (EDTA) pipeline, which integrates structure- and homology-based approaches for  
270 TE identification, including LTRharvest, LTR\_FINDER\_parallel, LTR\_retriever, Generic Repeat Finder,  
271 TIR-Learner, MITE-Hunter, and HelitronScanner, with extra basic and advanced filters (Ou et al. 2019).  
272 Clustering of TEs within the *Gypsy* family was conducted with cd-hit-est in CD-HIT (Cluster Database  
273 at High Identity with Tolerance) (Li and Godzik 2006), with the -c 0.8 (>80% sequence identity) option.

274 To clarify the evolutionary topology of certain *Gypsy* clusters, we aligned their sequences with  
275 MAFFT ver. 7 with the L-INS-i model, followed by manual pruning using SeaView. The alignments  
276 were concatenated and all sites, including missing data and gaps, were used to construct

277 phylogenetic trees with the maximum likelihood method using IQ-TREE 2 (Minh et al. 2020) with  
278 automatically optimized parameters.

279

#### 280 **Accession numbers and construction of database**

281 All genome sequences and the annotated data were deposited with the Persimmon Genome  
282 Database (<http://persimmon.kazusa.or.jp/index.html>) and Plant GARDEN  
283 (<https://plantgarden.jp/en/index>). All PacBio genome sequencing data were lodged with the DDBJ  
284 Sequence Read Archive (SRA) database (BioProject ID PRJDB14984).

285

286 **References**

- 287 Akagi T, Charlesworth D. 2019. Pleiotropic effects of sex-determining genes in the evolution of dioecy  
288 in two plant species. *Proc. R. Soc. B.* 286:20191805.
- 289 Akagi T, Henry IM, Kawai T, Comai L, Tao R. 2016. Epigenetic regulation of the sex determination  
290 gene *MeGI* in polyploid persimmon. *Plant Cell* 28:2905-2915.
- 291 Akagi T, Henry IM, Ohtani H, Morimoto T, Beppu K, Kataoka I, Tao R. 2018. A Y-encoded suppressor  
292 of feminization arose via lineage-specific duplication of a cytokinin response regulator in kiwifruit.  
293 *Plant Cell* 30:780-795.
- 294 Akagi T, Henry IM, Tao R, Comai L. 2014. A Y-chromosome–encoded small RNA acts as a sex  
295 determinant in persimmons. *Science* 346:646-650.
- 296 Akagi T, Jung K, Masuda K, Shimizu KK. 2022. Polyploidy before and after domestication of crop  
297 species. *Curr. Opin. Plant Biol.* 69:102255.
- 298 Akagi T, Kawai T, Tao R. 2016. A male determinant gene in diploid dioecious *Diospyros*, *OGL*, is  
299 required for male flower production in monoecious individuals of Oriental persimmon (*D. kaki*).  
300 *Sci. Hort.* 213:243-251.
- 301 Akagi T, Pilkington SM, Varkonyi-Gasic E, Henry IM, Sugano SS, Sonoda M, Firl A, McNeilage MA,  
302 Douglas MJ, Wang T et al. 2019. Two Y-chromosome-encoded genes determine sex in kiwifruit.  
303 *Nat. Plants* 5:801-809.
- 304 Akagi T, Shirasawa K, Nagasaki H, Hirakawa H, Tao R, Comai L, Henry IM. 2020. The persimmon  
305 genome reveals clues to the evolution of a lineage-specific sex determination system in plants.  
306 *PLOS Genet.* 16:e1008566.
- 307 Alonge M, Lebeigle L, Kirsche M, Jenike K, Ou S, Aganezov S, Wang X, Lippman ZB, Schatz MC,  
308 Soyk S. 2022. Automated assembly scaffolding using RagTag elevates a new tomato system for  
309 high-throughput genome editing. *Genome Biol.* 23:1-19.
- 310 Alonge M, Soyk S, Ramakrishnan S, Wang X, Goodwin S, Sedlazeck FJ, Lippman ZB, Schatz MC.  
311 2019. RaGOO: fast and accurate reference-guided scaffolding of draft genomes. *Genome Biol.*

- 312 20:1-17.
- 313 Beilstein MA, Nagalingum NS, Clements MD, Manchester SR, Mathews S. 2010. Dated molecular  
314 phylogenies indicate a Miocene origin for *Arabidopsis thaliana*. *Proc. Natl. Acad. Sci. USA*  
315 107:18724-18728.
- 316 Cabanettes F, Klopp C. 2018. D-GENIES: dot plot large genomes in an interactive, efficient and simple  
317 way. *PeerJ*. 6:4958. <https://doi.org/10.7717/peerj>.
- 318 Charlesworth B, Charlesworth D. 1978. A model for the evolution of dioecy and gynodioecy. *Am. Nat.*  
319 112:975-997.
- 320 Charlesworth D. 2019. Young sex chromosomes in plants and animals. *New Phytol.* 224:1095-1107.
- 321 Charlesworth D. 1985. Distribution of dioecy and self-incompatibility in angiosperms. In: P. J.  
322 Greenwood, M. Slatkin, editors. *Evolution: Essays in Honour of John Maynard Smith*.  
323 Cambridge:Cambridge University Press. p. 237-268.
- 324 Cheng H, Concepcion GT, Feng X, Zhang H, Li H. Haplotype-resolved de novo assembly using  
325 phased assembly graphs with hifiasm. 2021. *Nat. Methods* 18:170-175.
- 326 Darwin CR. 1877. *The Different Forms of Flowers on Plants of the Same Species*. London: John  
327 Murray.
- 328 Flynn JM, Hubley R, Goubert C, Rosen J, Clark AG, Feschotte C, Smit AF. 2020. RepeatModeler2 for  
329 automated genomic discovery of transposable element families. *Proc. Natl. Acad. Sci. USA*  
330 117:9451-9457.
- 331 Harkess A, Huang K, Van der Hulst R, Tissen B, Caplan JL, Koppula A, Batish M, Meyers BC,  
332 Leebens-Mack J. 2020. Sex determination by two Y-linked genes in garden asparagus. *Plant Cell*  
333 32:1790-1796.
- 334 Harkess A, Zhou J, Xu C, Bowers JE, Van der Hulst R, Ayyampalayam S, Mercati F, Riccardi P,  
335 McKain MR, Kakrana A et al. 2017. The asparagus genome sheds light on the origin and  
336 evolution of a young Y chromosome. *Nat. Commun.* 8:1-10.
- 337 Henry IM, Akagi T, Tao R, Comai L. 2018. One hundred ways to invent the sexes: theoretical and

- 338 observed paths to dioecy in plants. *Annu. Rev. Plant Biol.* 69:553-575.
- 339 Jaillon O, Aury JM, Wincker P. 2009. "Changing by doubling", the impact of whole genome  
340 duplications in the evolution of eukaryotes. *Comptes rendus Biol.* 332:241-253.
- 341 Katoh K, Standley DM. 2013. MAFFT multiple sequence alignment software version 7: improvements  
342 in performance and usability. *Mol. Biol. Evol.* 30:772-780.
- 343 Kazama Y, Kitoh M, Kobayashi T, Ishii K, Krasovec M, Yasui Y, Abe T, Kawano S, Filatov DA. 2022. A  
344 *CLAVATA3*-like gene acts as a gynoeceium suppression function in White Campion. *Mol. Biol.*  
345 *Evol.* 39:msac195.
- 346 Kumar S, Stecher G, Li M, Knyaz C, Tamura K. 2018. MEGA X: molecular evolutionary genetics  
347 analysis across computing platforms. *Mol. Biol. Evol.* 35:1547-1549.
- 348 Li H, Durbin R. 2009. Fast and accurate short read alignment with Burrows-Wheeler transform.  
349 *Bioinformatics* 25:1754-60.
- 350 Li W, Godzik A. 2006. Cd-hit: a fast program for clustering and comparing large sets of protein or  
351 nucleotide sequences. *Bioinformatics* 22:1658-1659.
- 352 Ma J, Ali S, Saleem MH, Mumtaz S, Yasin G, Ali B, Al-Ghamdi AA, Elshikh MS, Vodnar DC, Marc RA  
353 et al. 2022. Short-term responses of Spinach (*Spinacia oleracea* L.) to the individual and  
354 combinatorial effects of Nitrogen, Phosphorus and Potassium and silicon in the soil contaminated  
355 by boron. *Front. Plant Sci.* 13.
- 356 Maeda H, Akagi T, Onoue N, Kono A, Tao R. 2019. Evolution of lineage-specific gene networks  
357 underlying the considerable fruit shape diversity in persimmon. *Plant Cell Physiol.* 60:2464-2477.
- 358 Marçais G, Delcher AL, Phillippy AM, Coston R, Salzberg SL, Zimin A. 2018. MUMmer4: A fast and  
359 versatile genome alignment system. *PLOS Comput. Biol.* 14:e1005944.
- 360 Masuda K, Akagi T. 2022. Sexual System and Its Evolution. In: The Persimmon Genome: Springer,  
361 Cham. p. 97-107.
- 362 Masuda K, Ikeda Y, Matsuura T, Kawakatsu T, Tao R, Kubo Y, Ushijima K, Henry IM, Akagi T. 2022.  
363 Reinvention of hermaphroditism via activation of a *RADIALIS*-like gene in hexaploid persimmon.

- 364 *Nat. Plants* 8:217-224.
- 365 Masuda K, Yamamoto E, Shirasawa K, Onoue N, Kono A, Ushijima K, Kubo Y, Tao R, Henry IM, Akagi  
366 T. 2020. Genome-wide study on the polysomic genetic factors conferring plasticity of flower  
367 sexuality in hexaploid persimmon. *DNA Res.* 27:dsaa012.
- 368 Ming R, Bendahmane A, Renner SS. 2011. Sex chromosomes in land plants. *Annu. Rev. Plant Biol.*  
369 62:485-514.
- 370 Minh BQ, Schmidt HA, Chernomor O, Schrempf D, Woodhams MD, Von Haeseler A, Lanfear R. 2020.  
371 IQ-TREE 2: new models and efficient methods for phylogenetic inference in the genomic era.  
372 *Mol. Biol. Evol.* 37:1530-1534.
- 373 Müller NA, Kersten B, Leite Montalvão AP, Mähler N, Bernhardsson C, Bräutigam K, Carracedo  
374 Lorenzo Z, Hoenicka H, Kumar V, Mader M, et al. 2020. A single gene underlies the dynamic  
375 evolution of poplar sex determination. *Nat. Plants* 6:630-637.
- 376 Ou S, Jiang N. 2019. LTR\_FINDER\_parallel: parallelization of LTR\_FINDER enabling rapid  
377 identification of long terminal repeat retrotransposons. *Mob. DNA* 10:1-3.
- 378 Renner SS, Müller NA. 2021. Plant sex chromosomes defy evolutionary models of expanding  
379 recombination suppression and genetic degeneration. *Nat. Plants* 7:392-402.
- 380 Rice WR. 1992. Sexually antagonistic genes: experimental evidence. *Science* 256:1436-1439.
- 381 Robinson JT, Thorvaldsdóttir H, Winckler W, Guttman M, Lander ES, Getz G, Mesirov JP. 2011.  
382 Integrative genomics viewer. *Nat. Biotechnol.* 29:24-26.
- 383 Schaeffer CE, Figueroa ND, Liu X, Karro JE. 2016. phraider: Pattern-hunter based rapid ab initio  
384 detection of elementary repeats. *Bioinformatics* 32:i209-i215.
- 385 Shirasawa K, Ueta S, Murakami K, Abdelrahman M, Kanno A, Isobe S. 2022. Chromosome-scale  
386 haplotype-phased genome assemblies of the male and female lines of wild asparagus  
387 (*Asparagus kiusianus*), a dioecious plant species. *DNA Res.* 29:dsac002.
- 388 Simão FA, Waterhouse RM, Ioannidis P, Kriventseva EV, Zdobnov EM. 2015. BUSCO: assessing  
389 genome assembly and annotation completeness with single-copy orthologs. *Bioinformatics*



390 31:3210-3212.

391 Smit AFA, Hubley R, Green P. 2015. RepeatMasker Open-4.0. 2013-2015.

392 <http://www.repeatmasker.org>.

393 Suo Y, Sun P, Cheng H, Han W, Diao S, Li H, Mai Y, Zhao X, Li F, Fu, J. 2020. A high-quality  
394 chromosomal genome assembly of *Diospyros oleifera* Cheng. *GigaScience* 9:giz164.

395 VanBuren R, Wai CM, Zhang J, Han J, Arro J, Lin Z, Liao Z, Yu Q, Wang ML, Zee F et al. 2016.

396 Extremely low nucleotide diversity in the X-linked region of papaya caused by a strong selective  
397 sweep. *Genome Biol.* 17:1-11.

398 VanBuren R, Zeng F, Chen C, Zhang J, Wai CM, Han J, Aryal R, Gschwend AR, Wang J, Na JK et al.

399 2015. Origin and domestication of papaya Yh chromosome. *Genome Res.* 25:524-533.

400 Wang J, Na JK, Yu Q, Gschwend AR, Han J, Zeng F, Aryal R, VanBuren R, Murray JE, Zhang W et

401 al. 2012. Sequencing papaya X and Yh chromosomes reveals molecular basis of incipient sex  
402 chromosome evolution. *Proc. Natl. Acad. Sci. USA* 109:13710-13715.

403 Wang Y, Tang H, DeBarry JD, Tan X, Li J, Wang X, Lee T, Jin H, Marler B, Guo H, et al. 2012.

404 MCScanX: a toolkit for detection and evolutionary analysis of gene synteny and collinearity.  
405 *Nucleic Acids Res.* 40:e49.

406 Westergaard M. 1958. The mechanism of sex determination in dioecious flowering plants. *Adv. Genet.*

407 9:217-281.

408 Yang HW, Akagi T, Kawakatsu T, Tao R. 2019. Gene networks orchestrated by *MeGI*: a single - factor

409 mechanism underlying sex determination in persimmon. *Plant J.* 98:97-111.

410 Zhou Y, Massonnet M, Sanjak JS, Cantu D, Gaut BS. 2017. Evolutionary genomics of grape (*Vitis*

411 *vinifera ssp. vinifera*) domestication. *Proc. Natl. Acad. Sci. USA*, 114:11715-11720.

412 Zhou Y, Minio A, Massonnet M, Solares E, Lv Y, Beridze T, Cantu D, Gaut, BS. 2019. The population

413 genetics of structural variants in grapevine domestication. *Nat. Plants* 5:965-979.

414

415

416 **Acknowledgements**

417 We thank Dr. Deborah Charlesworth (Institute of Evolutionary Biology, University of Edinburgh, UK)  
418 for discussion and comments for this study, and Edanz (<https://jp.edanz.com/ac>) for editing a partial  
419 draft of the manuscript. This work was supported by PRESTO from Japan Science and Technology  
420 Agency (JST) [JPMJPR20Q1 to T.A.] and Grant-in-Aid for Scientific Research (B) [22H02339 to T.A.]  
421 and for Transformative Research Areas (A) [22H05172 and 22H05173 to T.A., and 22H05181 to K.S.]  
422 from JSPS.

423

424 **Author contribution statement**

425 T.A. conceived the study. A.H., K.M., and T.A. designed experiments. A.H., K.M., K.S., and T.A.  
426 conducted the experiments. A.H., K.M., K.S., and T.A. analyzed the data. N.O., N.F., K.U., and T.A.  
427 contributed to plant resources and facilities. A.H. and T.A. drafted the manuscript. All authors approved  
428 the manuscript.

429

430 **Conflict of Interest**

431 The authors declare no conflict of interest.

## 432 Figure legends

### 433 **Figure 1. Characterization of *Diospyros kaki* cv. Taishu draft genome**

434 **A.** Overview of 15 pseudomolecules comprising 14 autosomes (Chr1–14) and Y chromosome (Chr  
435 15). From the outer layers inward, chromosome numbers (i), relative density of transposable elements  
436 detected by EDTA [(ii) for LTR-type, (iii) for non-LTR type], and relative gene density (iv), are given. In  
437 the central area (v), syntenic relationships within the persimmon genome, with gene pairs showing  
438 silent-site divergence ( $dS$ ) = 0.6–0.9, which corresponds to a putative whole-genome duplication  
439 event,  $Dd-\alpha$  (see panel **B**), are indicated. **B.** Distribution of  $dS$  rates between homologous gene pairs  
440 within the *D. kaki*, *D. lotus*, tomato (*Solanum lycopersicum*), and grape (*Vitis vinifera*) genomes. The  
441 *D. kaki* and *D. lotus* genomes show a consistent peak, corresponding to  $Dd-\alpha$ , at the same  $dS$  value  
442 as the *Solanum* genome triplication. An additional peak in the *D. kaki* genome ( $dS$  = 1.24–1.50) is  
443 almost consistent with a peak in the *Vitis* genome, which would correspond to the hexaploidization  $\gamma$   
444 (*Hex- $\gamma$* ) event.

445

### 446 **Figure 2. Species divergence and evolutionary path of the post-Y chromosome in *Diospyros*** 447 ***kaki***

448 **A.** Comparison of the distribution of silent-site divergence ( $dS$ ) values for *D. kaki* allelic sequences  
449 (blue), between the orthologs in *D. kaki* and *D. oleifera* (orange), and in *D. kaki* and *D. lotus* (gray).  
450 The distribution of  $dS$  values in the *Kali*-SINE allelic sequences is indicated by green bars. **B.**  
451 Chromosome-scale synteny analysis based on the gene orders in the *D. kaki*, *D. oleifera*, and *D. lotus*  
452 genomes. **C.** Schematic model for the evolution of the post-Y chromosome, including the  $OG^m$   
453 silenced by the *Kali*-SINE insertion, with estimated ages. mya: million years ago. **D.** 1 Mb-bin walking  
454 analysis for the  $dS$  values between the orthologs in *D. kaki* and *D. oleifera*, and in *D. kaki* and *D. lotus*.  
455 Most of the genome showed smaller  $dS$  between *D. kaki* and *D. oleifera* than between *D. kaki* and *D.*  
456 *lotus*, which was consistent with the genome-wide  $dS$  distribution (shown in panel **A**). **E.** Expanded  
457 view of a region exhibiting smaller  $dS$  between *D. kaki* and *D. lotus* than between *D. kaki* and *D.*  
458 *oleifera*, implying potential introgression from the *D. lotus* genome.

459

### 460 **Figure 3. Comparative analysis of X and Y chromosomes in *Diospyros kaki***

461 **A.** Synteny based on the allelic genes between X and Y chromosomes. Putative allelic genes with  
462 significant synteny ( $<1e^{-50}$  in BLASTP) are connected with dark red lines. The upper and lower  
463 triangular areas indicate self-synteny dot plots. The post-MSY is located flanking the putative  
464 centromeric region. **B.** Synteny between the post-MSY and the counterpart X-allelic region. In the  
465 post-MSY, fragmental synteny blocks are observed. **C.** Transition of 1 Mb bin silent-site divergence  
466 ( $dS$ ) values between X and Y allelic genes (dark yellow lines, with SD). As a control, the transition of  
467 1 Mb bin  $dS$  values amongst the alleles for Chr 1 (or an autosome) is shown (blue lines, with SD).  
468 The post-MSY exhibited a distinct increase in  $dS$  values against the X alleles. **D.** The distribution of  
469 the  $dS$  values in each gene, in the 3 Mb region surrounding the post-MSY.

470

### 471 **Figure 4. Comparative analysis of the MSY in *Diospyros lotus* and the post-MSY in *D. kaki***

472 **A.** Synteny between the MSY in *D. lotus* and the post-MSY in *D. kaki*. During the 3–4 million years  
473 since their divergence (see Fig. 1C), their structures have been highly rearranged. **B.** Mapping of the  
474 random gDNAseq data of *D. kaki* cv. Taishu to the post-MSY and the flanking PAR. The sequence  
475 coverage suggested that the post-MSY in *D. kaki* was enriched with repetitive sequences. **C.**  
476 Comparison of transposable elements (TEs) accumulation in the *D. lotus* MSY and the *D. kaki* post-  
477 MSY. The LTR-type TEs were more highly enriched in the *D. kaki* post-MSY. **D.** Phylogenetic analysis  
478 of a *Gypsy* cluster 23, which exhibited the *D. kaki* post-MSY-specific recent burst, with substitution  
479 rates  $< 0.05$ . **E.** Histogram of pairwise  $dS$  values in the *Gypsy* cluster 23, suggesting that dynamic TE  
480 bursts occurred after the *Kali*-SINE insertion, or establishment of the  $Y^m$  chromosome (or post-MSY).

481

482 **Figure 5. Model for the ongoing evolution of the post-Y chromosome**

483 Since the establishment of the *OGI* inversion, the common ancestor of *D. lotus* and *D. kaki* had formed  
484 a putative MSY. Immediately after the divergence of *D. lotus* and *D. kaki*, *OGI* was silenced to  
485 establish the post-Y chromosome in the *D. kaki* ancestral lineage. The post-MSY has been  
486 continuously extended and rearranged via active TEs, which might be more rapid than for the MSY in  
487 dioecious *D. lotus*.

488

489

490 **Figure 1**

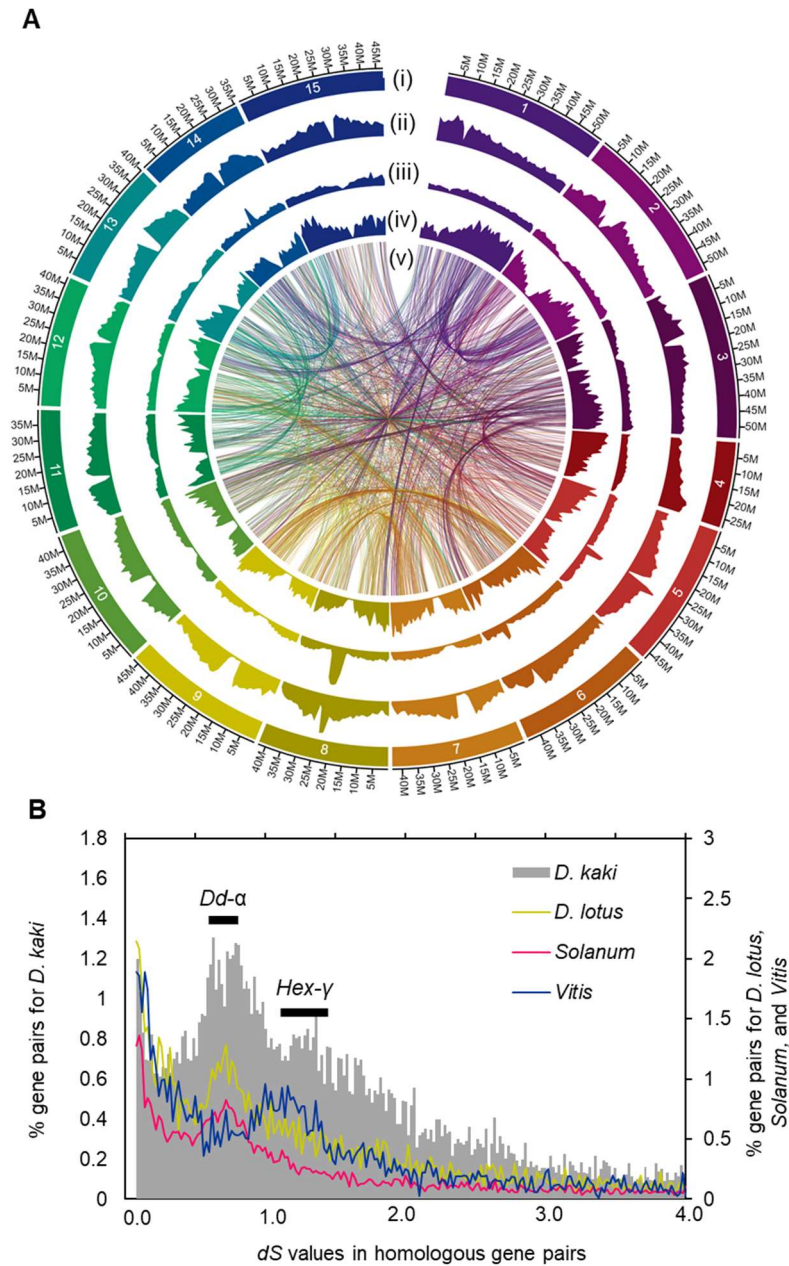

491

492

493 **Figure 1. Characterization of *Diospyros kaki* cv. Taishu draft genome**

494 **A.** Overview of 15 pseudomolecules comprising 14 autosomes (Chr1–14) and Y chromosome (Chr  
 495 15). From the outer layers inward, chromosome numbers (i), relative density of transposable elements  
 496 detected by EDTA [(ii) for LTR-type, (iii) for non-LTR type], and relative gene density (iv), are given. In  
 497 the central area (v), syntenic relationships within the persimmon genome, with gene pairs showing  
 498 silent-site divergence ( $dS$ ) = 0.6–0.9, which corresponds to a putative whole-genome duplication  
 499 event,  $Dd-\alpha$  (see panel **B**), are indicated. **B.** Distribution of  $dS$  rates between homologous gene pairs  
 500 within the *D. kaki*, *D. lotus*, tomato (*Solanum lycopersicum*), and grape (*Vitis vinifera*) genomes. The  
 501 *D. kaki* and *D. lotus* genomes show a consistent peak, corresponding to  $Dd-\alpha$ , at the same  $dS$  value  
 502 as the *Solanum* genome triplication. An additional peak in the *D. kaki* genome ( $dS = 1.24-1.50$ ) is  
 503 almost consistent with a peak in the *Vitis* genome, which would correspond to the hexaploidization  $\gamma$   
 504 ( $Hex-\gamma$ ) event.

505

506 **Figure 2**

507

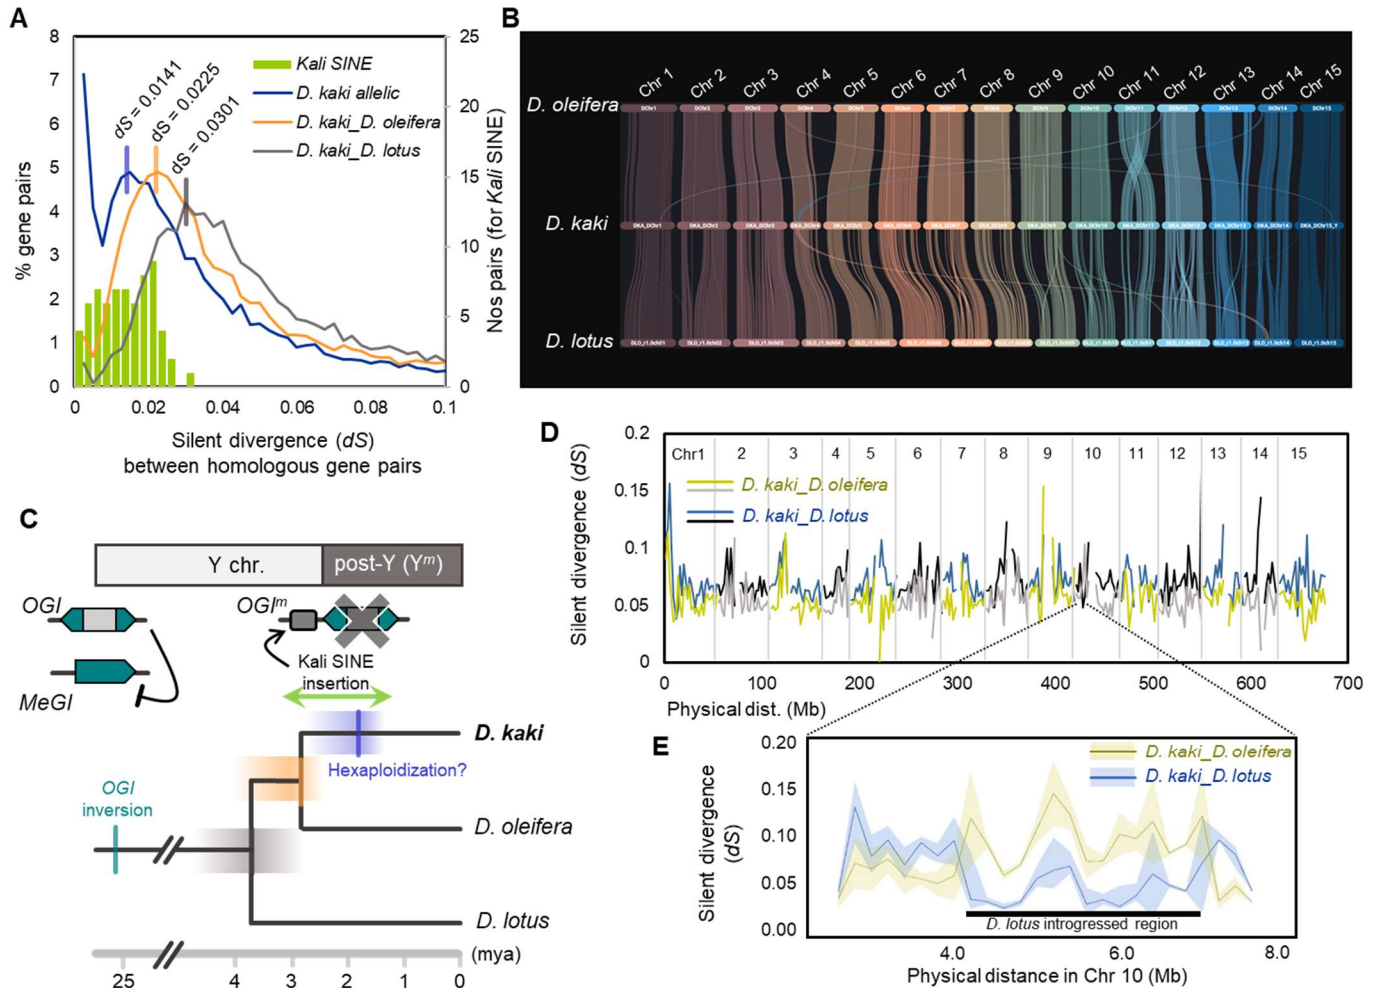

508

509 **Figure 2. Species divergence and evolutionary path of the post-Y chromosome in *Diospyros***  
510 ***kaki***

511 **A.** Comparison of the distribution of silent-site divergence ( $dS$ ) values for *D. kaki* allelic sequences  
512 (blue), between the orthologs in *D. kaki* and *D. oleifera* (orange), and in *D. kaki* and *D. lotus* (gray).  
513 The distribution of  $dS$  values in the *Kali*-SINE allelic sequences is indicated by green bars. **B.**  
514 Chromosome-scale synteny analysis based on the gene orders in the *D. kaki*, *D. oleifera*, and *D. lotus*  
515 genomes. **C.** Schematic model for the evolution of the post-Y chromosome, including the OGI<sup>m</sup>  
516 silenced by the *Kali*-SINE insertion, with estimated ages. mya: million years ago. **D.** 1 Mb-bin walking  
517 analysis for the  $dS$  values between the orthologs in *D. kaki* and *D. oleifera*, and in *D. kaki* and *D.*  
518 *lotus*, which was consistent with the genome-wide  $dS$  distribution (shown in panel **A**). **E.** Expanded  
519 view of a region exhibiting smaller  $dS$  between *D. kaki* and *D. lotus* than between *D. kaki* and *D.*  
520 *oleifera*, implying potential introgression from the *D. lotus* genome.  
521

522

523

524 **Figure 3**

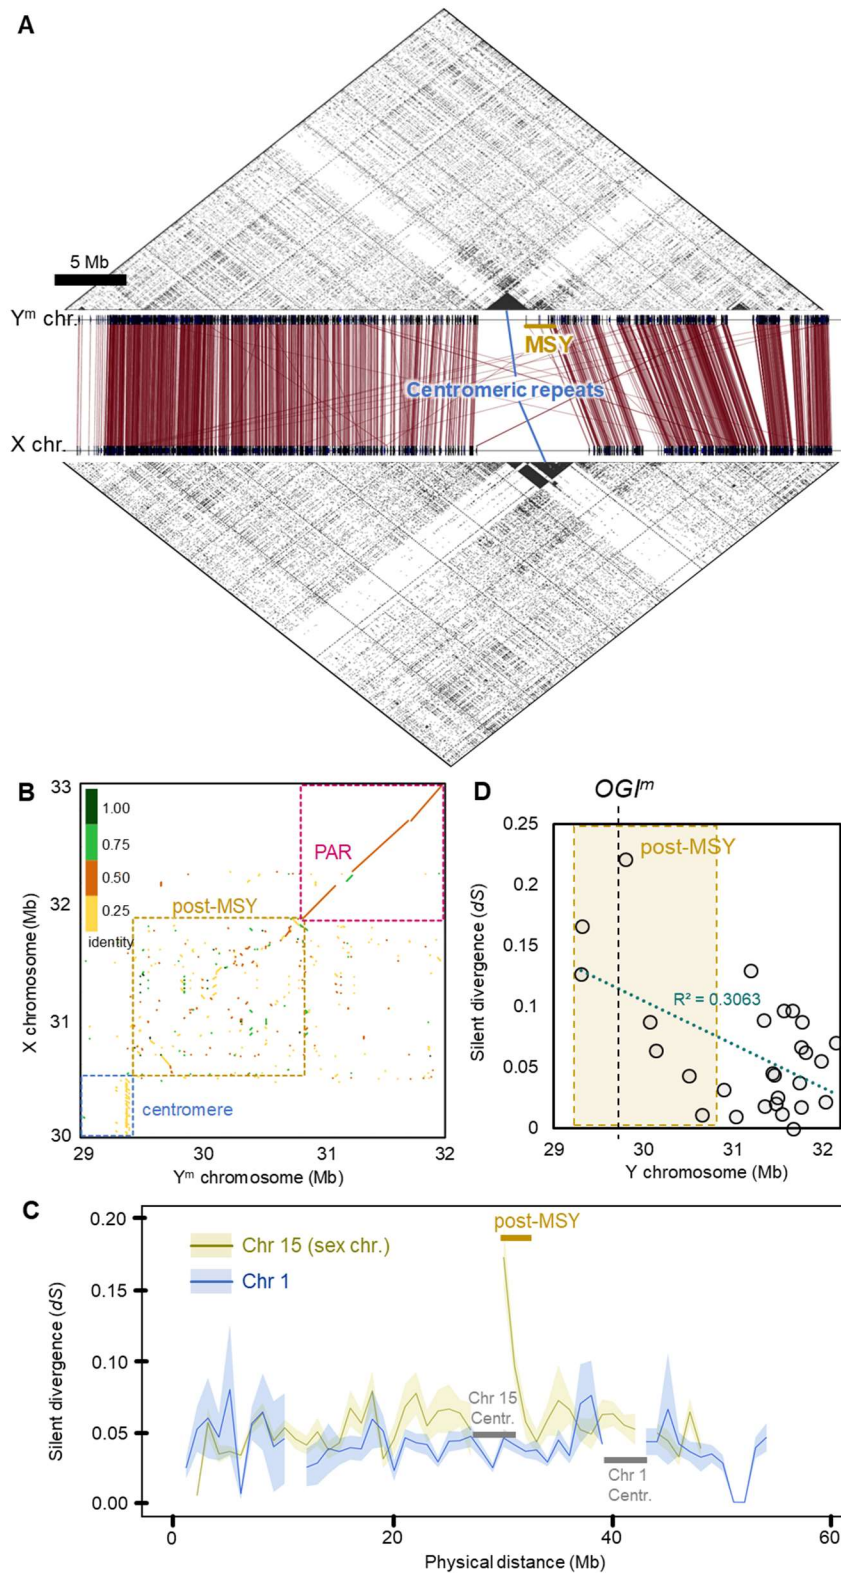

525

526

527 **Figure 3. Comparative analysis of X and Y chromosomes in *Diospyros kaki***

528 **A.** Synteny based on the allelic genes between X and Y chromosomes. Putative allelic genes with  
529 significant synteny ( $<1e^{-50}$  in BLASTP) are connected with dark red lines. The upper and lower

530 triangular areas indicate self-synteny dot plots. The post-MSY is located flanking the putative  
531 centromeric region. **B.** Synteny between the post-MSY and the counterpart X-allelic region. In the  
532 post-MSY, fragmental synteny blocks are observed. **C.** Transition of 1 Mb bin silent-site divergence  
533 ( $dS$ ) values between X and Y allelic genes (dark yellow lines, with SD). As a control, the transition of  
534 1 Mb bin  $dS$  values amongst the alleles for Chr 1 (or an autosome) is shown (blue lines, with SD).  
535 The post-MSY exhibited a distinct increase in  $dS$  values against the X alleles. **D.** The distribution of  
536 the  $dS$  values in each gene, in the 3 Mb region surrounding the post-MSY.

537

538



539 **Figure 4**

540

541

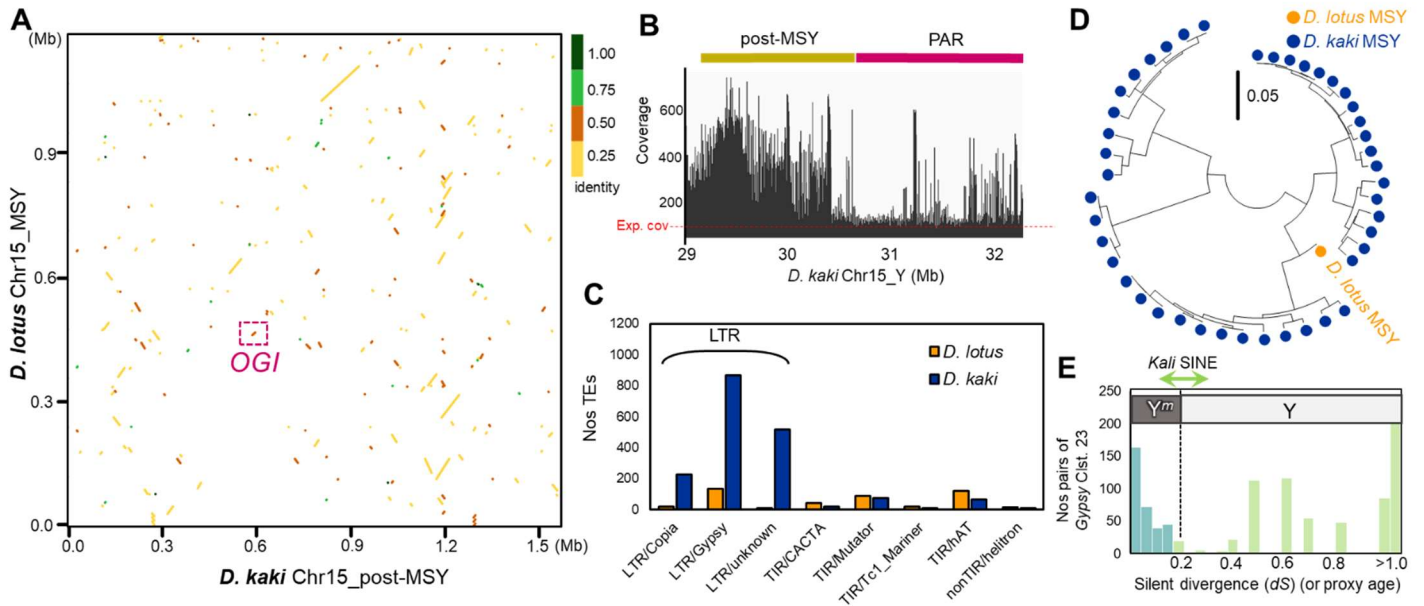

542

543

544 **Figure 4. Comparative analysis of the MSY in *Diospyros lotus* and the post-MSY in *D. kaki***  
 545 **A.** Synteny between the MSY in *D. lotus* and the post-MSY in *D. kaki*. During the 3–4 million years  
 546 since their divergence (see Fig. 1C), their structures have been highly rearranged. **B.** Mapping of the  
 547 random gDNAseq data of *D. kaki* cv. Taishu to the post-MSY and the flanking PAR. The sequence  
 548 coverage suggested that the post-MSY in *D. kaki* was enriched with repetitive sequences. **C.**  
 549 Comparison of transposable elements (TEs) accumulation in the *D. lotus* MSY and the *D. kaki*  
 550 post-MSY. The LTR-type TEs were more highly enriched in the *D. kaki* post-MSY. **D.** Phylogenetic analysis  
 551 of a Gypsy cluster 23, which exhibited the *D. kaki* post-MSY-specific recent burst, with substitution  
 552 rates < 0.05. **E.** Histogram of pairwise *dS* values in the Gypsy cluster 23, suggesting that dynamic TE  
 553 bursts occurred after the *Kali*-SINE insertion, or establishment of the *Y<sup>m</sup>* chromosome (or post-MSY).

554

555

556 **Figure 5**

557

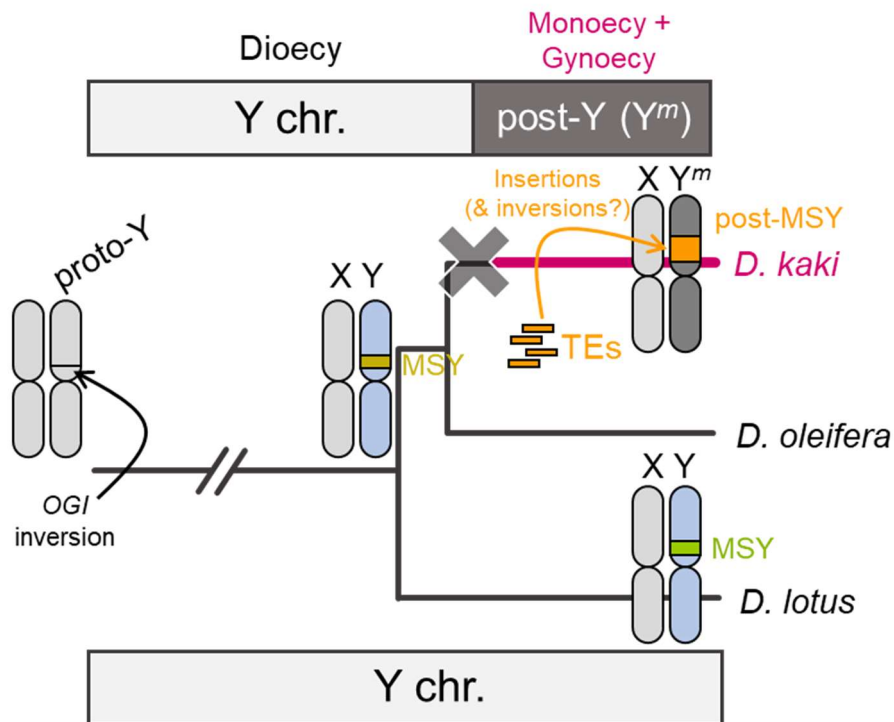

558

559

560

561 **Figure 5. Model for the ongoing evolution of the post-Y chromosome**

562 Since the establishment of the *OGI* inversion, the common ancestor of *D. lotus* and *D. kaki* had formed  
563 a putative MSY. Immediately after the divergence of *D. lotus* and *D. kaki*, *OGI* was silenced to  
564 establish the post-Y chromosome in the *D. kaki* ancestral lineage. The post-MSY has been  
565 continuously extended and rearranged via active TEs, which might be more rapid than for the MSY in  
566 dioecious *D. lotus*.

567
